# Supplementary material for: Cyclodextrin-Calcium Carbonate Micro- to Nano-Particles: Targeting Vaterite Form and Hydrophobic Drug Loading/Release
Source: MDPI journal article supplement (doi:10.3390/pharmaceutics15020653), 2023-02-15
Supplement: s1 [file s1]

Article

# Cyclodextrin-Calcium Carbonate Micro- to Nano-particles : Targeting Vaterite Form and Hydrophobic Drug Loading/Release

Cléa Chesneau<sup>1</sup>, Alpha Oumar Sow<sup>1</sup>, Fadila Hamachi<sup>1</sup>, Laurent Michely<sup>1</sup>, Séna Hamadi<sup>1</sup>, Rémy Pires<sup>1</sup>, André Pawlak<sup>2,3</sup> and Sabrina Belbekhouche<sup>1\*</sup>

<sup>1</sup> Université Paris Est Creteil, CNRS, Institut Chimie et Matériaux Paris Est, UMR 7182, 2 Rue Henri Dunant, 94320 Thiais, France

<sup>2</sup> Université Paris Est, Faculté de Médecine, UMRS 955, Créteil, F-94010 France.

<sup>3</sup> Université Paris Est Creteil, CNRS, Institut Chimie et Matériaux Paris Est, UMR 7182, 2 Rue Henri Dunant, 94320 Thiais, France

\* Correspondence: belbekhouche@icmpe.cnrs.fr, phone: + 331 4978 1149, fax: + 331 4978 1208 .

## Supporting information

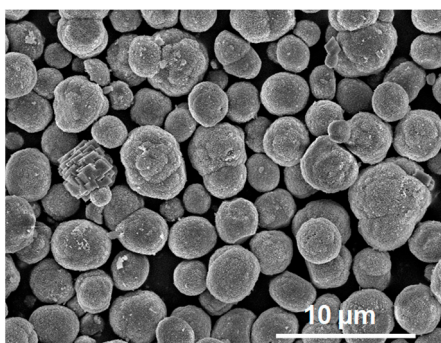

**Figure S1.** Scanning Electron Microscopy image of CD-calcium carbonate microparticles prepared.
